# Supplementary material for: The TaWRKY22–TaCOPT3D Pathway Governs Cadmium Uptake in Wheat
Source: MDPI journal article supplement (doi:10.3390/ijms231810379), 2022-09-08
Supplement: s1 [file s1]

**Table S1.** Primers used in the present work.

| Primers | Sequences (5'-3')     | Description                                                                                                                                              |
|---------|-----------------------|----------------------------------------------------------------------------------------------------------------------------------------------------------|
| F1      | CTAACGTCATTCA         | qPCR for <i>TaCOPT3D</i>                                                                                                                                 |
|         | AACTACC               |                                                                                                                                                          |
| R1      | TTACGGAATGGTC         |                                                                                                                                                          |
|         | CAACGTACC             | Cloning of <i>TaCOPT3D</i>                                                                                                                               |
| F2      | ATCCAGCCCAGGA         |                                                                                                                                                          |
|         | CCCAACAC              |                                                                                                                                                          |
| R2      | TAGGCAACGGTAA         | Generation of vector for wheat transformation and prokaryotic expression. Restriction site of <i>Bam</i> HI in F3 and <i>Kpn</i> I in R3 marked in bold. |
|         | CTTGCAA               |                                                                                                                                                          |
| F3      | <b>GGATCC</b> CATGGTA |                                                                                                                                                          |
|         | AGCTTGACGAC           | Generation of vector for Y1H assay. Restriction site of <i>Bam</i> HI in F4 and <i>Nde</i> I in R4 marked in bold.                                       |
| R3      | <b>GGTACCA</b> AATAAA |                                                                                                                                                          |
|         | CGTTAGCGGCA           |                                                                                                                                                          |
| F4      | <b>GGATCC</b> CATGGTA | Detecting transgenic wheat expressing <i>TaCOPT3D</i>                                                                                                    |
|         | AGCTTGACGAC           |                                                                                                                                                          |
| R4      | <b>CATATGA</b> AATAAA |                                                                                                                                                          |
|         | CGTTAGCGGCA           |                                                                                                                                                          |
| F5      | TGCAACTCGGTAG         |                                                                                                                                                          |
|         | TACCAA                |                                                                                                                                                          |
| R5      | CTAGGCATGGCTG         |                                                                                                                                                          |
|         | AATG                  |                                                                                                                                                          |
