# Supplementary material for: The TaWRKY22–TaCOPT3D Pathway Governs Cadmium Uptake in Wheat
Source: MDPI journal article supplement (doi:10.3390/ijms231810379), 2022-09-08

### Supplementary Figure Legends

**Figure S1.** (a) Schematics of the plant expression vector used in the wheat transformation. (b) Identification of transgenic wheat lines using PCR. (c) Gene expression of *TaCOPT3D* in WT and transgenic lines. \*\*indicates a significant difference at  $P \leq 0.01$ .

Supplementary Figure S1

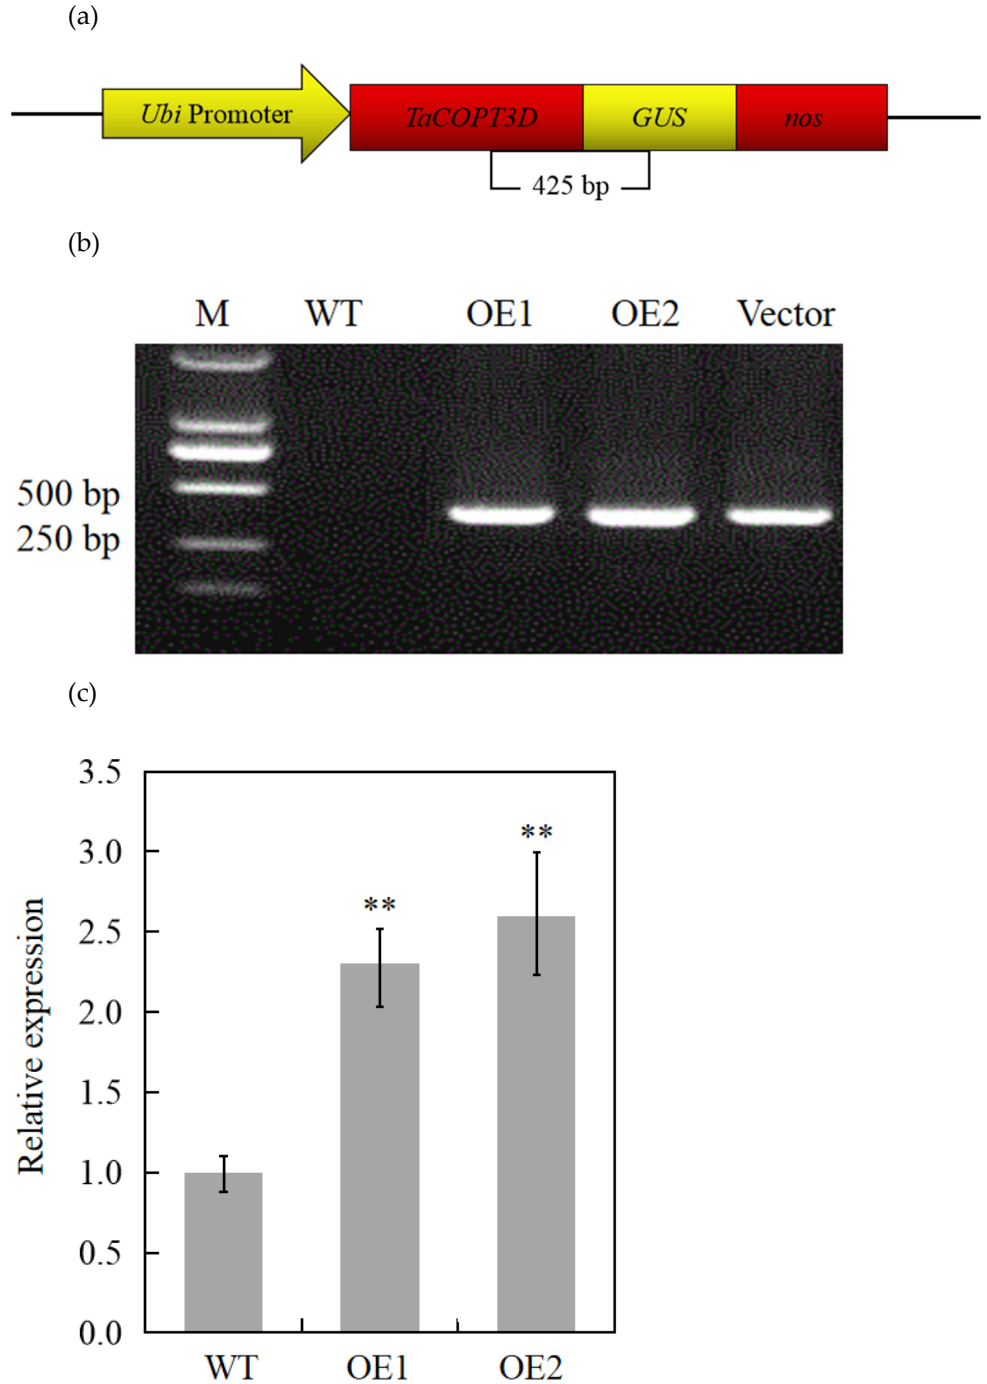

Supplement: s1 [file s1]
